# Supplementary material for: UAV-Based High-Throughput Approach for Fast Growing <em>Cunninghamia lanceolata (Lamb.)</em> Cultivar Screening by Machine Learning
Source: Preprints.org preprint supplement (doi:10.20944/preprints201907.0158.v1), 2019-07-11
Supplement: Supplementary file 1 [file supplementary]

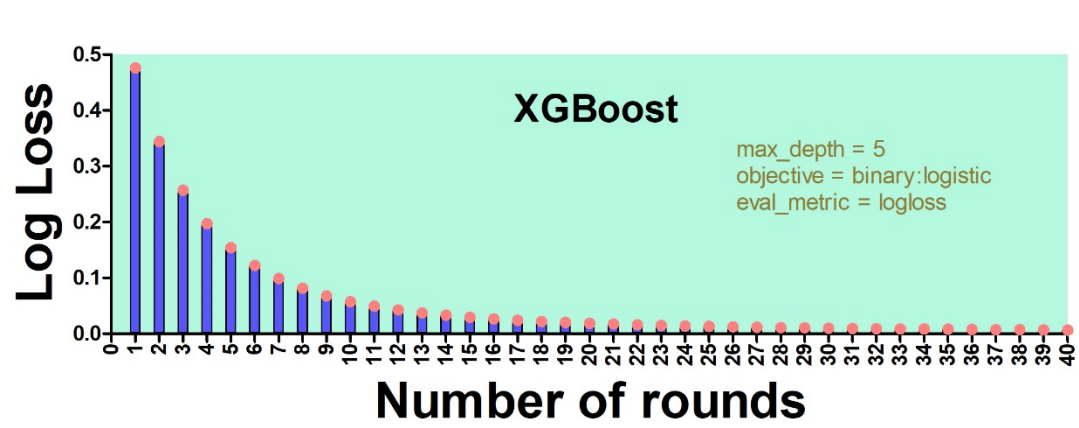

**Fig.S1 Logarithmic Loss (Log Loss) evaluation results for XGBoost.**

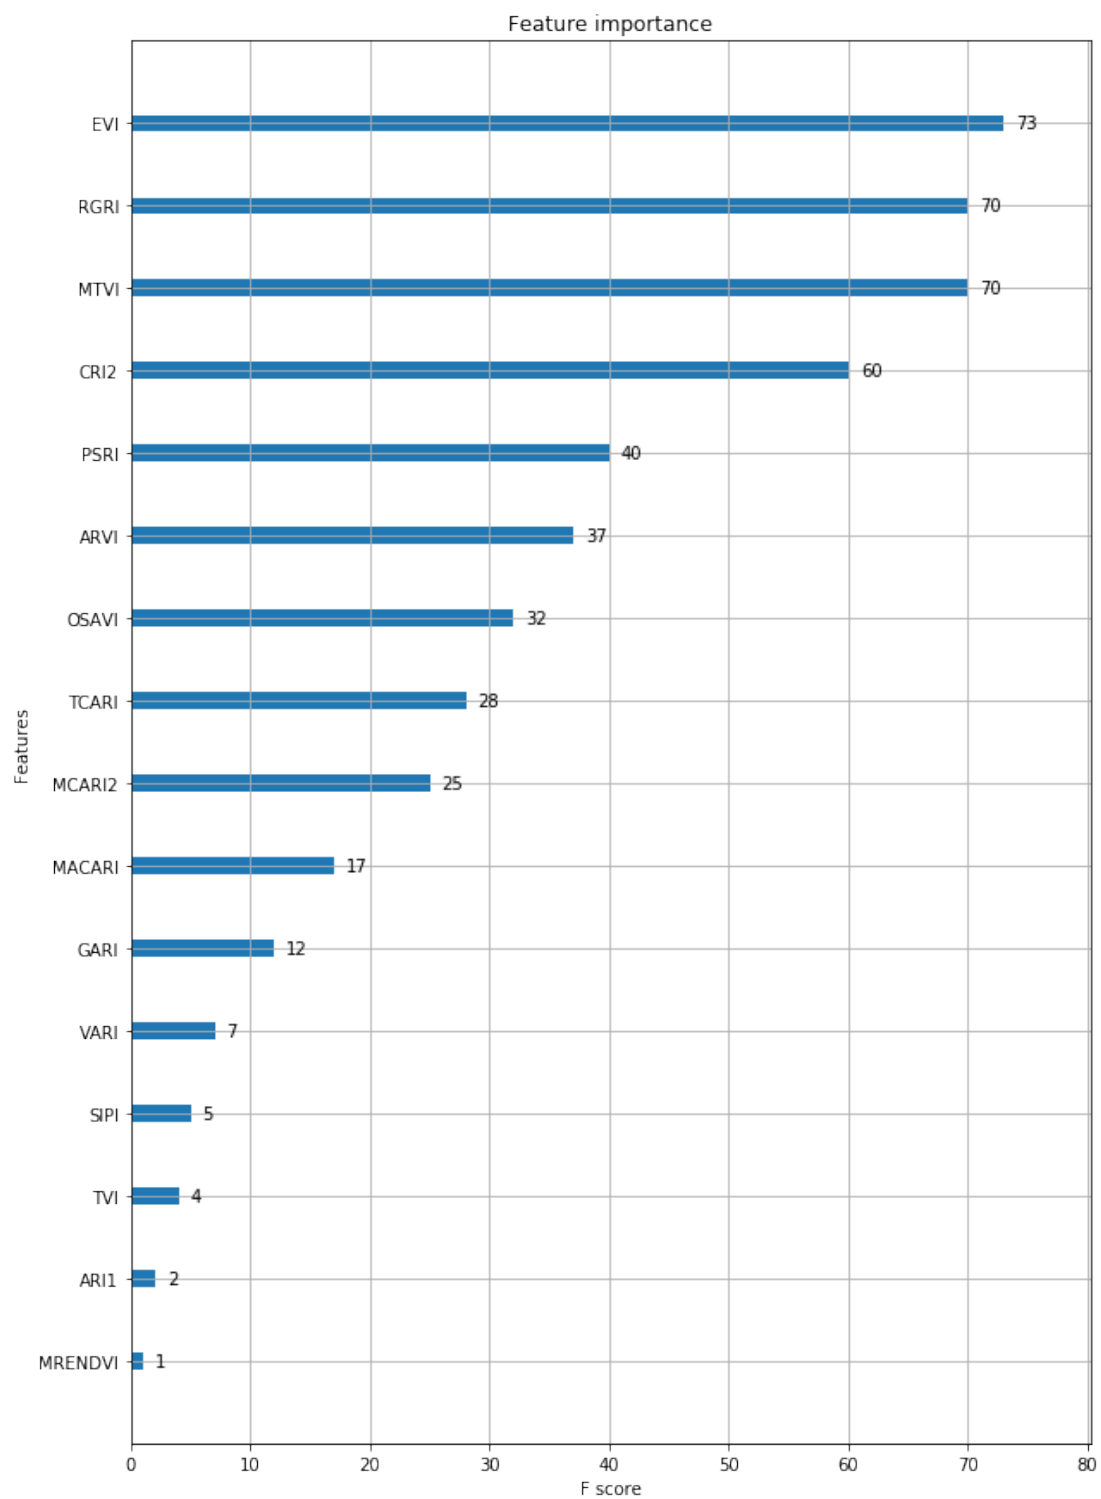

**Fig. S2 Feature importance of 19 vegetation indices in this study, evaluated by F score.**
